# Supplementary material
Source: PubMed Central journal article supplement (PMC10485743)
Supplement: jamaotolaryngolheadnecksurg-e232701-s001.pdf [file jamaotolaryngolheadnecksurg-e232701-s001.pdf]

## Supplementary Online Content

Sheikh S, Ho ML, Eisner M, et al. Elexacaftor-tezacaftor-ivacaftor therapy for chronic sinus disease in cystic fibrosis. *JAMA Otolaryngol Head Neck Surg*. Published online September 7, 2023. doi:10.1001/jamaoto.2023.2701

**eTable 1.** Agreement Percentage and  $\kappa$  Values Among 3 Sinus CT Reviewers

**eTable 2.** Comparison of Clinical Outcomes 1 Year vs 1 Year of Receiving ETI and Number of Participants Receiving Therapies at the Start Compared With 1 Year of Receiving ETI

This supplementary material has been provided by the authors to give readers additional information about their work.

**eTable 1.** Agreement Percentage and  $\kappa$  Values Among 3 Sinus CT Reviewers

| <b>Parameter</b>                                   | <b>Subjects</b> | <b>% Agreement</b> | <b>Kappa<sup>1</sup></b> | <b>95% CI<sup>2</sup></b> |
|----------------------------------------------------|-----------------|--------------------|--------------------------|---------------------------|
| SL start right maxillary opacification             | 64              | 78.1               | 0.77                     | 0.67-0.87                 |
| SL start right nasal cavity obstruction            | 64              | 84.4               | 0.78                     | 0.68-0.88                 |
| SL start right displacement of lateral nasal wall  | 64              | 90.6               | 0.22                     | 0.08-0.36                 |
| SL start right uncinate process absence            | 64              | 92.2               | 0.56                     | 0.41-0.7                  |
| SL start right mucocele                            | 64              | 90.6               | 0.81                     | 0.67-0.95                 |
| SL start left maxillary opacification              | 64              | 82.8               | 0.82                     | 0.72-0.92                 |
| SL start left nasal cavity obstruction             | 64              | 68.8               | 0.62                     | 0.52-0.72                 |
| SL start left displacement of lateral nasal wall   | 64              | 78.1               | 0.14                     | 0-0.28                    |
| SL start left uncinate process absence             | 64              | 93.8               | 0.58                     | 0.44-0.72                 |
| SL start left mucocele                             | 64              | 82.8               | 0.68                     | 0.53-0.82                 |
| SL 1-year right maxillary opacification            | 64              | 87.5               | 0.66                     | 0.55-0.77                 |
| SL 1-year right nasal cavity obstruction           | 64              | 64.1               | 0.22                     | 0.08-0.36                 |
| SL 1-year right displacement of lateral nasal wall | 64              | 90.6               | 0.11                     | -0.03-0.25                |
| SL 1-year right uncinate process absence           | 64              | 96.9               | 0.74                     | 0.6-0.88                  |
| SL 1-year right mucocele                           | 64              | 95.3               | 0.73                     | 0.59-0.87                 |
| SL 1-year left maxillary opacification             | 64              | 71.9               | 0.49                     | 0.38-0.6                  |
| SL 1-year left nasal cavity obstruction            | 64              | 75.0               | 0.02                     | -0.11-0.16                |
| SL 1-year left displacement of lateral nasal wall  | 64              | 90.6               | 0.22                     | 0.08-0.36                 |
| SL 1-year left uncinate process absence            | 64              | 93.8               | 0.69                     | 0.55-0.83                 |
| SL 1-year left mucocele                            | 64              | 93.8               | 0.73                     | 0.59-0.87                 |
| LM start right frontal sinus                       | 64              | 78.1               | 0.73                     | 0.63-0.83                 |
| LM start right anterior ethmoid                    | 64              | 76.6               | 0.66                     | 0.54-0.79                 |
| LM start right posterior ethmoid                   | 64              | 81.2               | 0.65                     | 0.54-0.76                 |
| LM start right maxillary sinus                     | 64              | 81.2               | 0.63                     | 0.5-0.76                  |
| LM start right sphenoid sinus                      | 64              | 76.6               | 0.67                     | 0.56-0.78                 |
| LM start right ostiomeatal occlusion               | 64              | 87.5               | 0.55                     | 0.41-0.69                 |
| LM start left frontal sinus                        | 64              | 68.8               | 0.60                     | 0.5-0.71                  |
| LM start left anterior ethmoid                     | 64              | 65.6               | 0.49                     | 0.37-0.61                 |
| LM start left posterior ethmoid                    | 64              | 75.0               | 0.48                     | 0.37-0.59                 |
| LM start left maxillary sinus                      | 64              | 78.1               | 0.59                     | 0.46-0.72                 |
| LM start left sphenoid sinus                       | 64              | 67.2               | 0.59                     | 0.48-0.7                  |
| LM start left ostiomeatal occlusion                | 64              | 82.8               | 0.60                     | 0.46-0.74                 |
| LM 1-year right frontal sinus                      | 64              | 71.9               | 0.64                     | 0.53-0.74                 |
| LM 1-year right anterior ethmoid                   | 64              | 54.7               | 0.25                     | 0.11-0.38                 |
| LM 1-year right posterior ethmoid                  | 64              | 39.1               | 0.15                     | 0.01-0.29                 |

**eTable 1.** Agreement Percentage and  $\kappa$  Values Among 3 Sinus CT Reviewers

| <b>Parameter</b>                 | <b>Subjects</b> | <b>% Agreement</b> | <b>Kappa<sup>1</sup></b> | <b>95% CI<sup>2</sup></b> |
|----------------------------------|-----------------|--------------------|--------------------------|---------------------------|
| LM 1-year right maxillary sinus  | 64              | 78.1               | 0.43                     | 0.29-0.57                 |
| LM 1-year right sphenoid sinus   | 64              | 54.7               | 0.43                     | 0.3-0.56                  |
| LM 1-year left frontal sinus     | 64              | 75.0               | 0.64                     | 0.53-0.75                 |
| LM 1-year left anterior ethmoid  | 64              | 62.5               | 0.41                     | 0.29-0.53                 |
| LM 1-year left posterior ethmoid | 64              | 43.8               | 0.23                     | 0.09-0.36                 |
| LM 1-year left maxillary sinus   | 64              | 78.1               | 0.40                     | 0.26-0.54                 |
| LM 1-year left sphenoid sinus    | 64              | 51.6               | 0.32                     | 0.19-0.45                 |

<sup>1</sup>Kappa interpretation: slight agreement, 0.20 or less; fair agreement, 0.21-0.40; moderate agreement, 0.41-0.60; good agreement, 0.61-0.80; very good agreement, 0.81-1.00.

<sup>2</sup>CI = Confidence Interval

LM: Lund-Mackay, SL-Sheikh-Lind

**eTable 2.** Comparison of Clinical Outcomes 1 Year vs 1 Year of Receiving ETI and Number of Participants Receiving Therapies at the Start Compared With 1 Year of Receiving ETI

| <b>Characteristic</b>                           | <b>1-year before ETI, N = 64<sup>1</sup></b> | <b>1-year after ETI, N = 64<sup>1</sup></b> | <b>Effect size<sup>2</sup></b> | <b>95% CI<sup>2,3</sup></b> |
|-------------------------------------------------|----------------------------------------------|---------------------------------------------|--------------------------------|-----------------------------|
| CF exacerbations                                | 3.50 (1.00, 6.00)                            | 0 (0, 1.00)                                 | 1.4                            | 1.0, 1.8                    |
| Hospital admissions                             | 1.00 (0, 1.25)                               | 0 (0, 0)                                    | 0.80                           | 0.44, 1.2                   |
| I/V antibiotics                                 | 1.00 (0, 1.25)                               | 0 (0, 0)                                    | 1.0                            | 0.65, 1.4                   |
| Oral/neb antibiotics                            | 2.00 (1.00, 4.25)                            | 0 (0, 1.00)                                 | 1.3                            | 0.94, 1.7                   |
| Chest therapy (VEST)                            | 63 (98%)                                     | 52 (81%)                                    | 0.50                           | 0.24, 0.50                  |
| Pulmozyme                                       | 59 (92%)                                     | 26 (41%)                                    | 0.50                           | 0.40, 0.50                  |
| Hypersal therapy                                | 42 (66%)                                     | 18 (28%)                                    | 0.50                           | 0.36, 0.50                  |
| Intranasal steroids                             | 41 (64%)                                     | 35 (55%)                                    | 0.50                           | 0.11, 0.50                  |
| Nasal saline irrigations                        | 33 (52%)                                     | 25 (39%)                                    | 0.50                           | 0.18, 0.50                  |
| Nebulized antibiotics for sinopulmonary disease | 18 (28%)                                     | 8 (12%)                                     | 0.50                           | 0.22, 0.50                  |
| Culture method                                  |                                              |                                             | 0.47                           | 0.35, 0.49                  |
| Sputum                                          | 46 (72%)                                     | 15 (24%)                                    |                                |                             |
| Throat swab                                     | 18 (28%)                                     | 48 (76%)                                    |                                |                             |

<sup>1</sup>Median (IQR); n (%)

<sup>2</sup>Cohen's d; Cohen's g

<sup>3</sup>CI = Confidence Interval
