# Supplementary material
Source: PubMed Central journal article supplement (PMC10485743)
Supplement: jamaotolaryngolheadnecksurg-e232701-s002.pdf [file jamaotolaryngolheadnecksurg-e232701-s002.pdf]

## Data Sharing Statement

Sheikh. Elexacaftor-Tezacaftor-Ivacaftor Therapy for Chronic Sinus Disease in Cystic Fibrosis. *JAMA Otolaryngol Head Neck Surg.* Published September 07, 2023.

doi:10.1001/jamaoto.2023.2701

### Data

**Data available:** Yes

**Data types:** Deidentified participant data

**How to access data:** [shahid.sheikh@nationwidechildrens.org](mailto:shahid.sheikh@nationwidechildrens.org)

**When available:** With publication

### Supporting Documents

**Document types:** None

### Additional Information

**Who can access the data:** researchers whose proposed use of the data has been approved after approval of our local IRB

**Types of analyses:** research

**Mechanisms of data availability:** with investigator support, after approval of a proposal and with a signed data access agreement

**Any additional restrictions:** local IRB approval
